# Supplementary material
Source: PubMed Central journal article supplement (PMC5849095)
Supplement: cix335_suppl_supplementary_figure_1.pdf [file cix335_suppl_supplementary_figure_1.pdf]

Supplementary Figure 1. Mean CD4 percentages (a) and counts (cells/mm<sup>3</sup>) (b) by group at 6-monthly intervals. Bars represent standard errors.

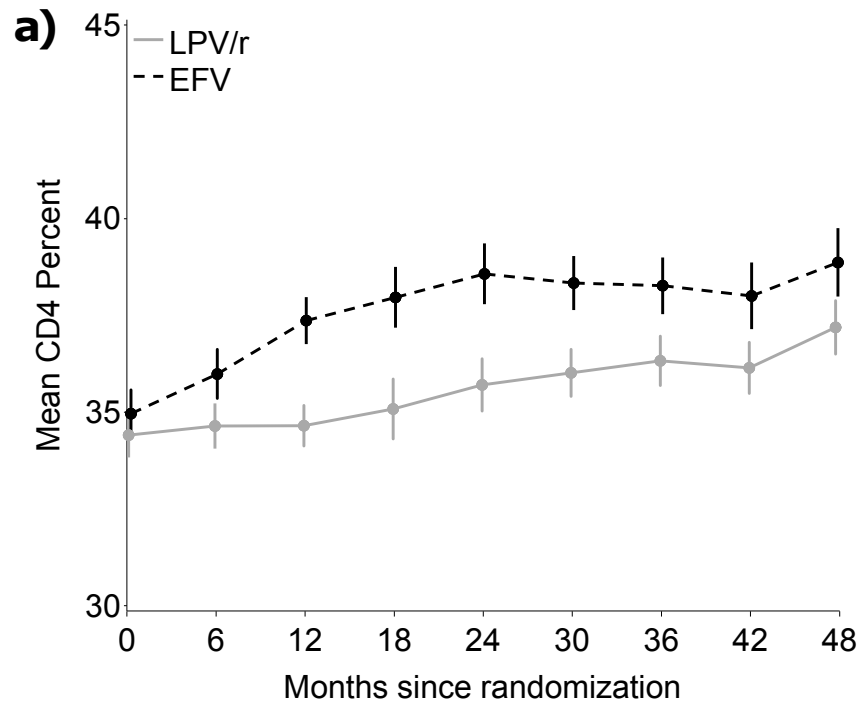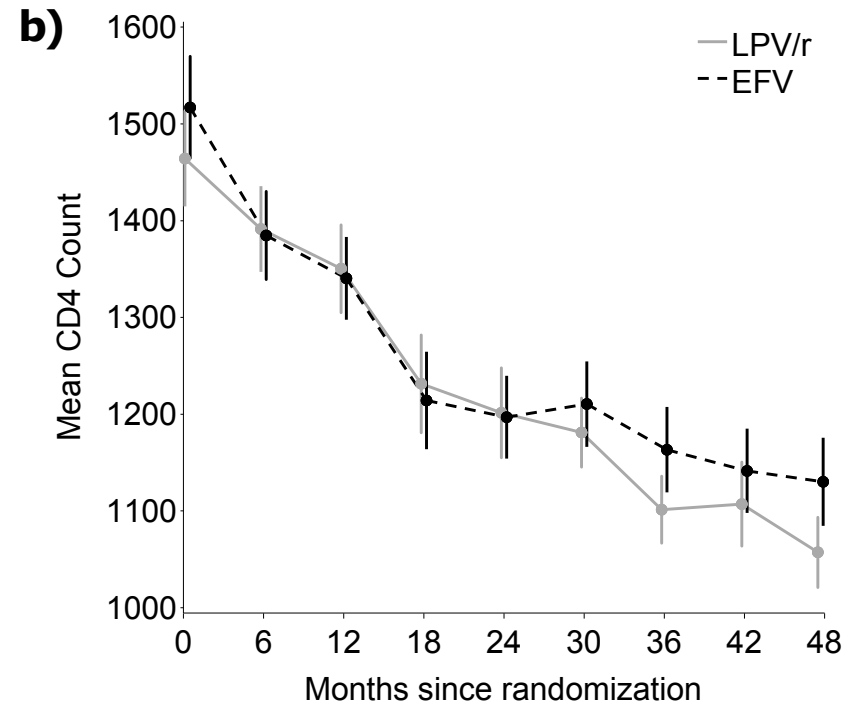

Text
